# Supplementary material for: Robot assisted rehabilitation of the arm after stroke: prototype design and clinical evaluation
Source: Springer Nature journal article supplement (doi:10.1007/s11432-017-9076-9), 2017-06-12
Supplement: 11432_2017_9076_MOESM1_ESM.pdf [file 11432_2017_9076_MOESM1_ESM.pdf]

# Robot Assisted Rehabilitation After Stroke: Prototype Design and Clinical Evaluation

Liang Peng, Zeng-Guang Hou\*, Long Peng,

Lincong Luo, Weiqun Wang

Institute of Automation, Chinese Academy of Sciences

\*Corresponding Author : Zeng-Guang Hou (Email: zengguang.hou@ia.ac.cn)

# Neurological Injury

## —Stroke

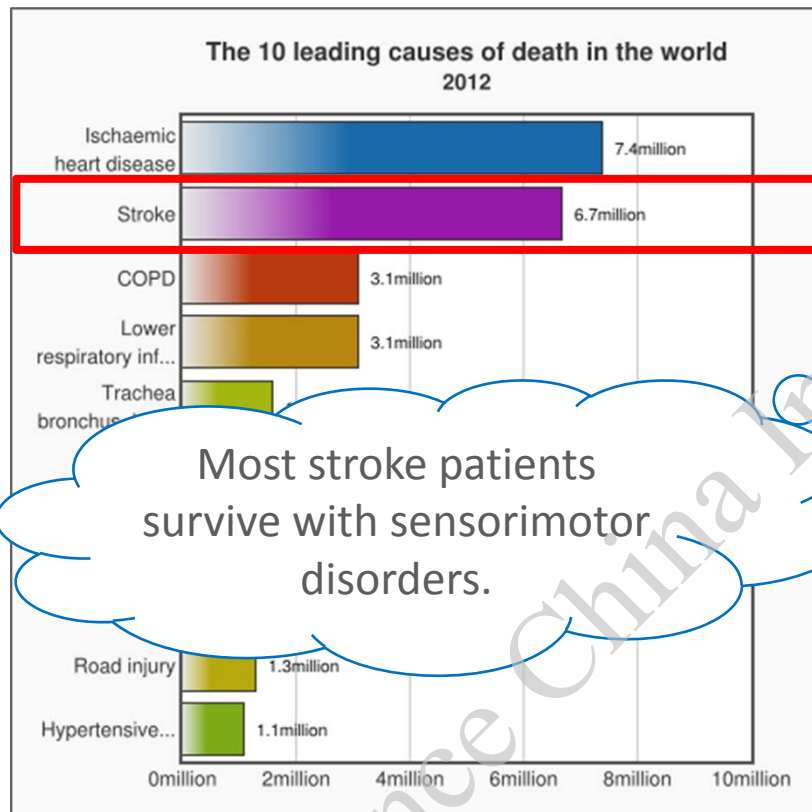

<http://www.who.int/mediacentre/factsheets/fs310/en/>

According to the US National Stroke Association:

- 10% of stroke survivors recover almost completely.
- 25% recover with minor impairments.
- 40% experience moderate to severe impairments that require special care.
- 10% require care in a nursing home or other long-term facility.
- 15% die shortly after the stroke.
- Approximately 14% of stroke survivors experience a second stroke in the first year following a stroke.

# Manual Therapy VS. Robot-aided Training

| Manual Therapy                           | Robot-aided Training                                      |
|------------------------------------------|-----------------------------------------------------------|
| <u>Depends more on therapist's skill</u> | <u>Precise and consistent assistance</u>                  |
| <u>Tedious during long-term training</u> | <u>Interesting with video games</u>                       |
| Large burden on therapist effort         | Be able to work continuously without sacrificing accuracy |
| Rough notes after training by therapist  | Real-time monitoring and recording during training        |
| High cost                                | Low cost in use                                           |
| ...                                      | ...                                                       |

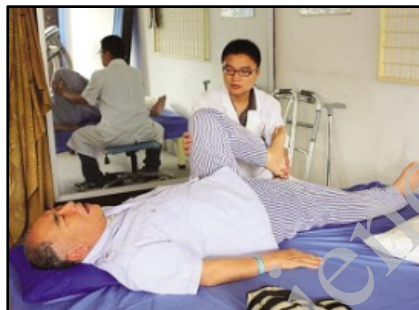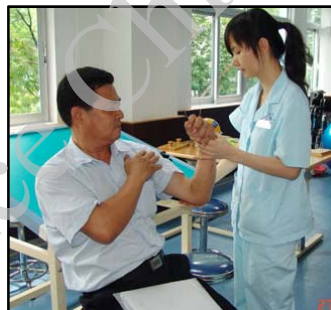

VS

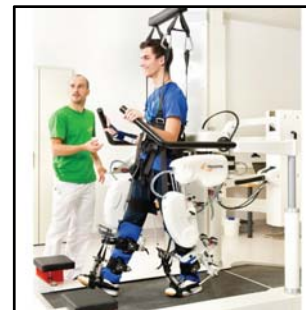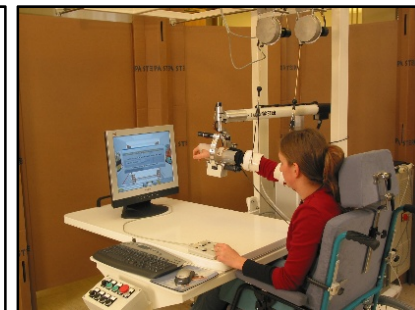

# Upper-limb Rehabilitation Robot

Virtual Training Environment  
Visual/Audio Feedback

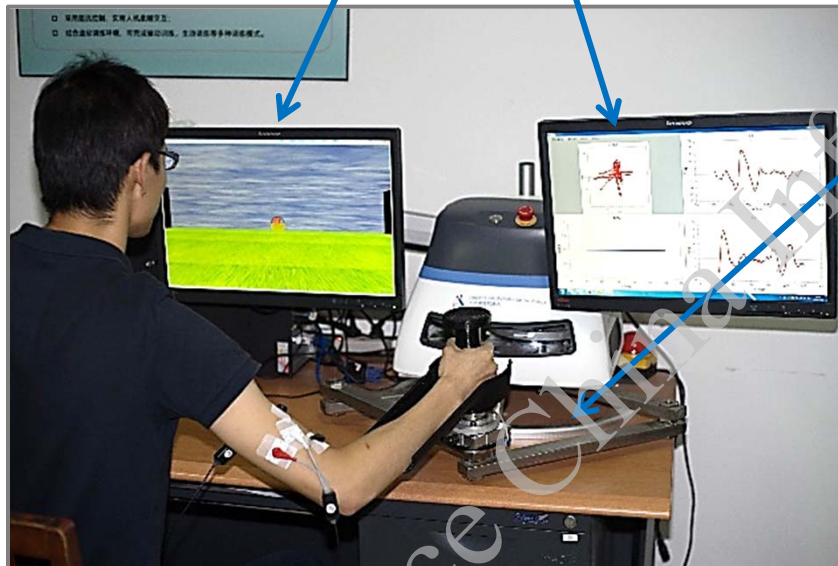

Robot-aided Training Scenario

Haptic Interface  
Force Feedback

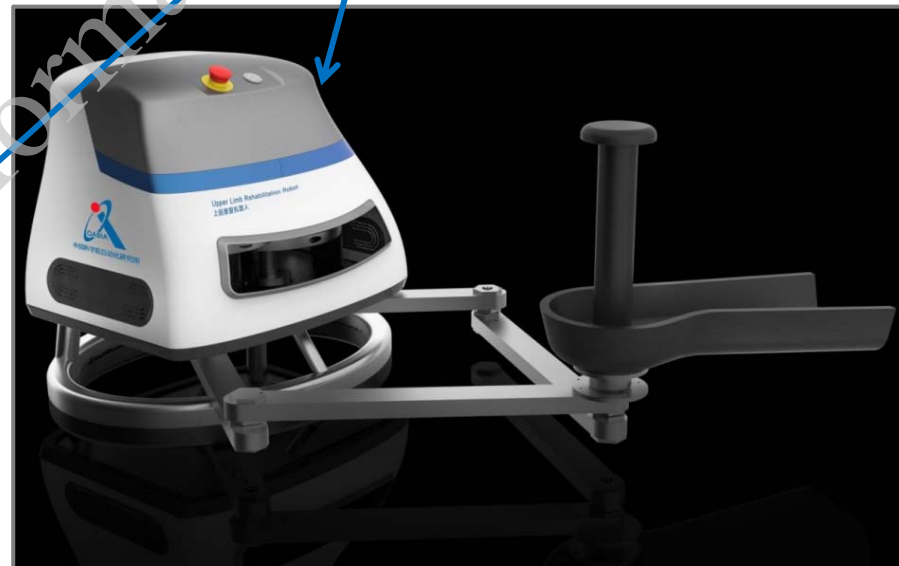

CASIA-ARM Rehab Robot

# Prototype Design

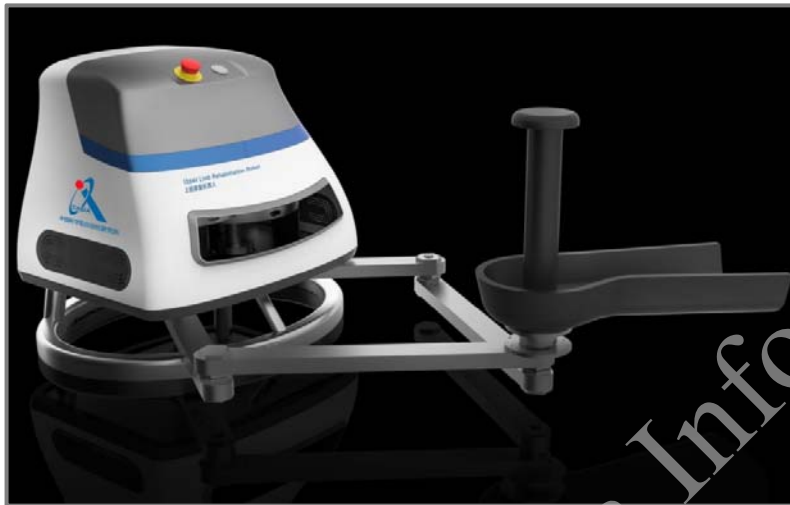

**Prototype**

## Technical Specification

|                       |                                                                |
|-----------------------|----------------------------------------------------------------|
| Degrees of freedom    | 2                                                              |
| Actuation             | 2 DC motors                                                    |
| Sensors               | 2 rotary encoders                                              |
| Range of joint motion | $80^{\circ} \sim 220^{\circ}$ , $-40^{\circ} \sim 100^{\circ}$ |
| Workspace             | 500 mm * 416 mm                                                |
| Motor Torque          | $\sim 450$ mNm                                                 |
| Reduction Ratio       | 20:1                                                           |
| Force Capability      | $>32.8$ N                                                      |

## Features:

- 5-bar parallel structure  
(Compact, stiff joint)
- DC motor driven, steel cable transmission  
(Smooth torque regulation, no backlash, back-drivable)

# Force Feedback Analysis

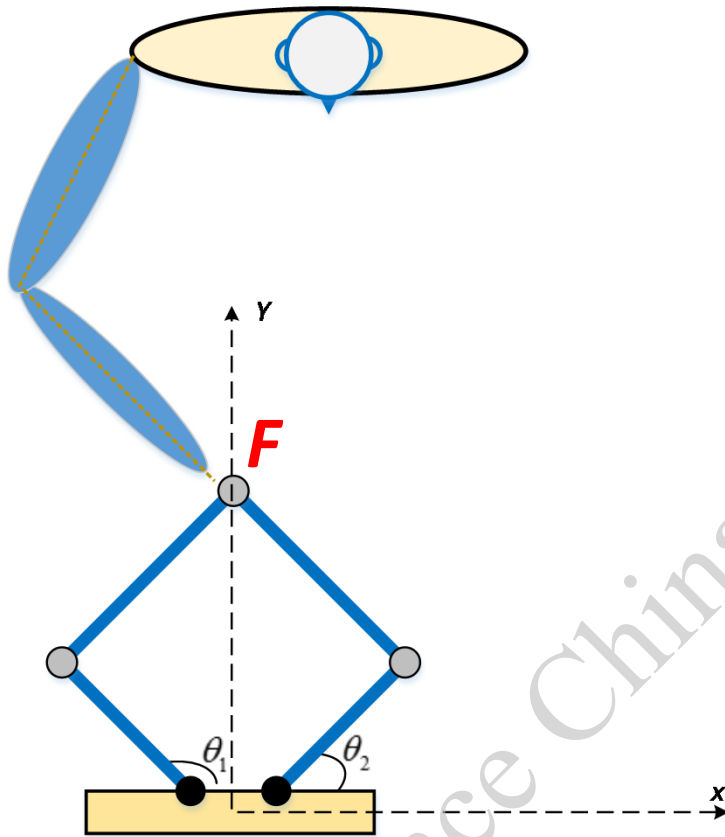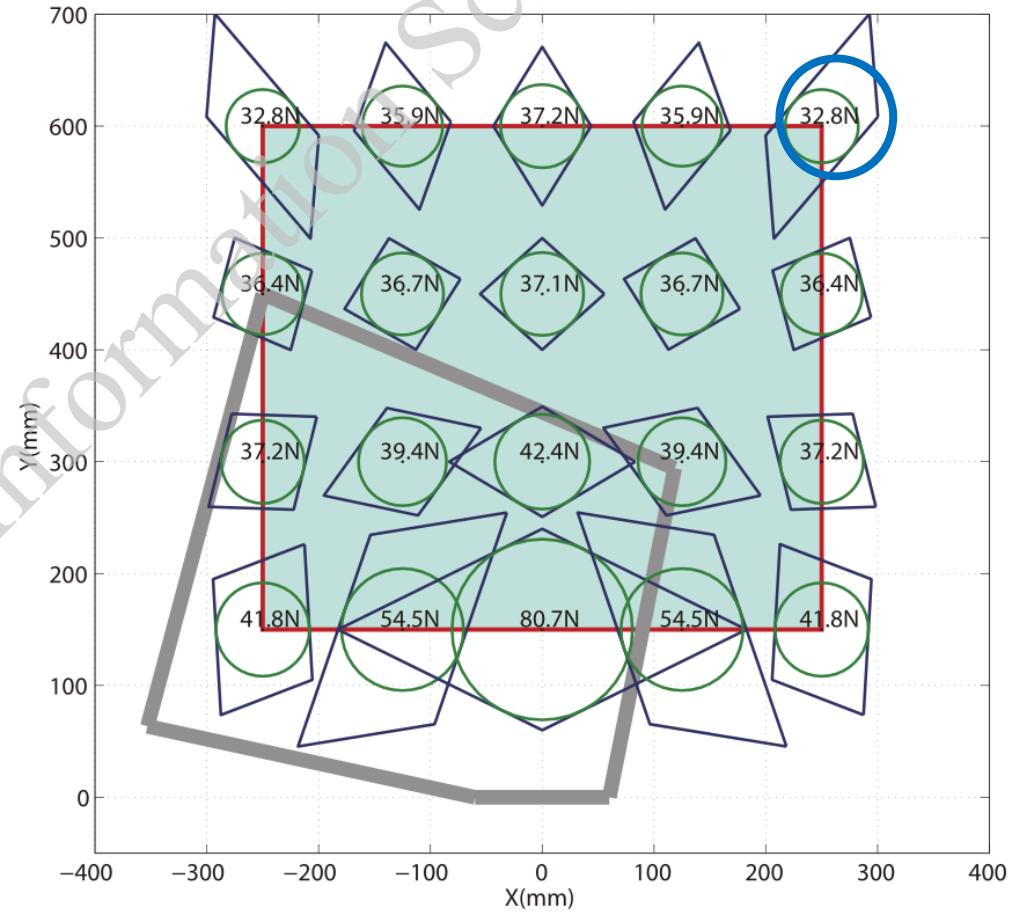

$$F = J(\theta_1, \theta_2)^{-T} [nT_{m1}, nT_{m2}]^T$$

# High Level Controller

## —Reaching Task Example

- Trajectory Planning (mimic normal human movement )

Minimum jerk trajectory between two points  $(x_i, y_i)$  and  $(x_d, y_d)$ :

$$\frac{x(t) - x_i}{x_d - x_i} = \frac{y(t) - y_i}{y_d - y_i}$$

$$= 10(t/\tau)^3 - 15(t/\tau)^4 + 6(t/\tau)^5$$

- “Assisted as Needed” Force Controller

➤ Forward direction:

$$F_x = \begin{cases} -k_x(x - x_{ref}) - b_x\dot{x} & |x_{th} < x < x_{ref}| \\ 0 & |x < x_{th} \text{ or } x > x_{ref}| \end{cases}$$

➤ Vertical direction:

$$F_y = \begin{cases} -k_y(|y| - |y_{wall}|) - b_y\dot{y} & |y| > w_{wall} \\ 0 & |y| < w_{wall} \end{cases}$$

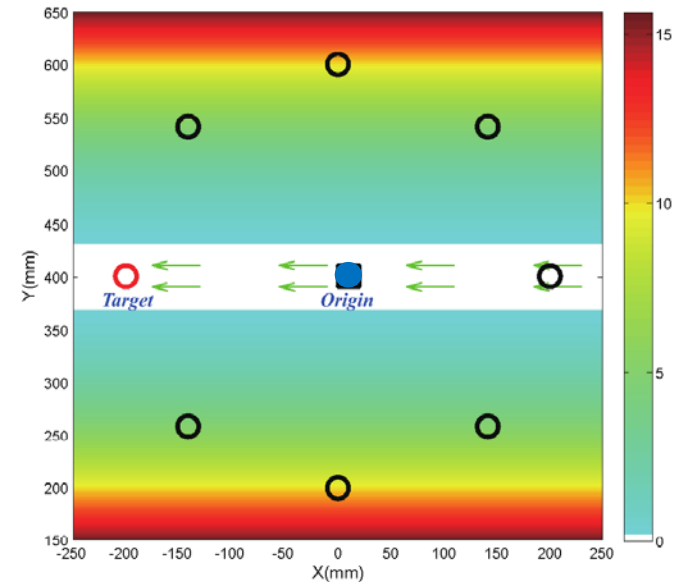

# Low Level Controller

## □ Impedance Controller

$$\begin{cases} F = -K(X - X_{ref}) - B\dot{X} \\ T = J^T F \end{cases}$$

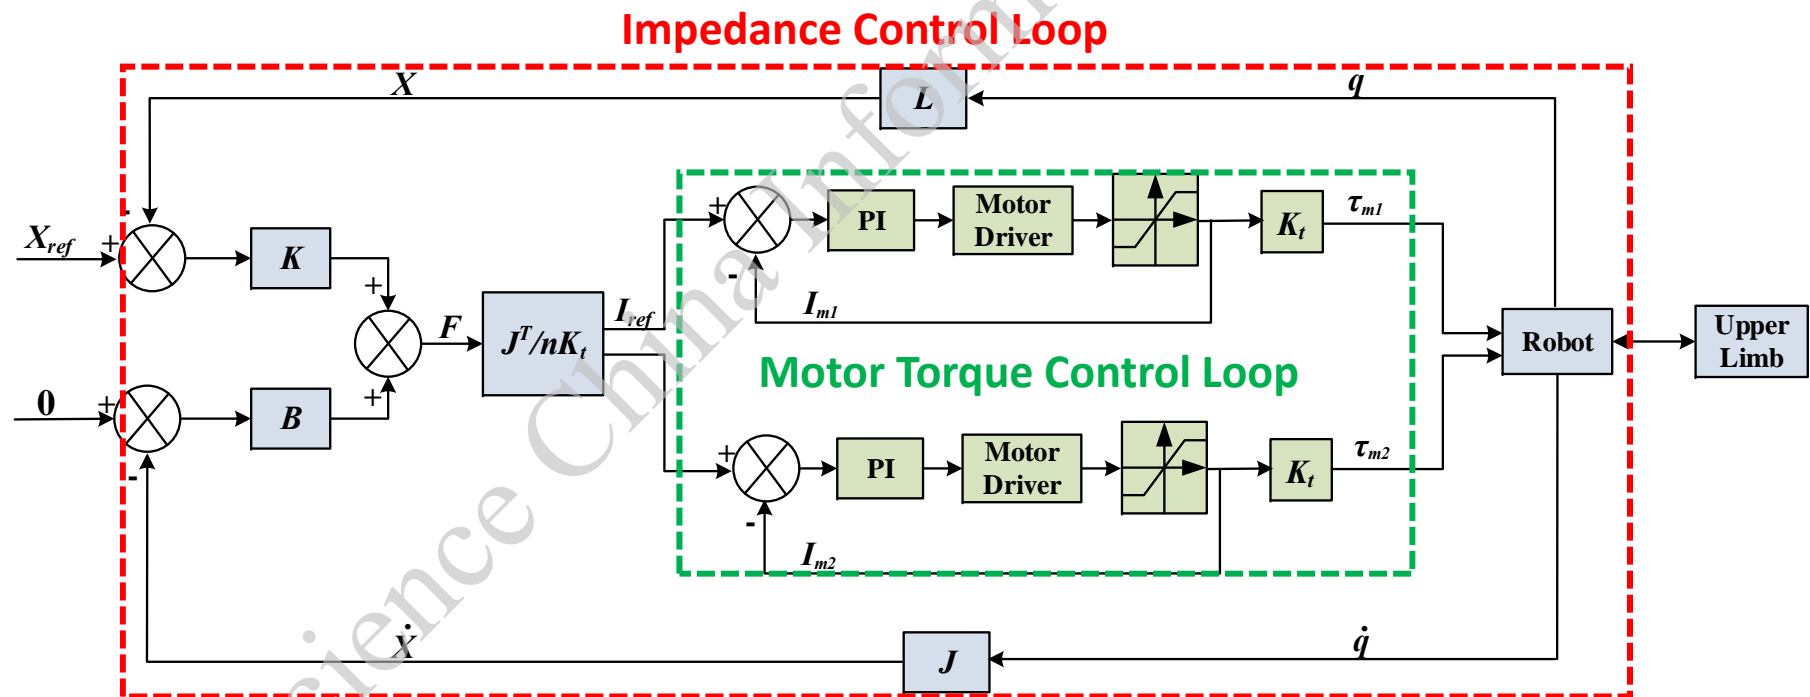



# Clinical Trials

□ 20 min × 20 sessions (5 days/week × 4 weeks)

**Experiment Group**  
robotic therapy

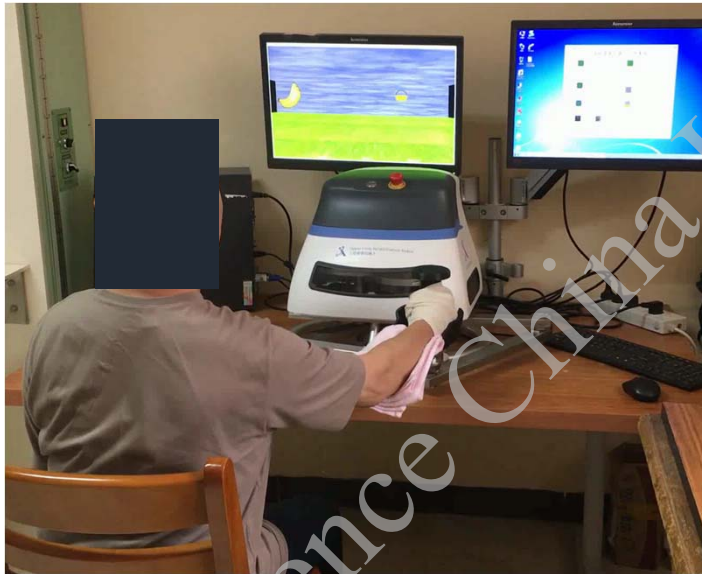

**Control Group**  
conventional therapy

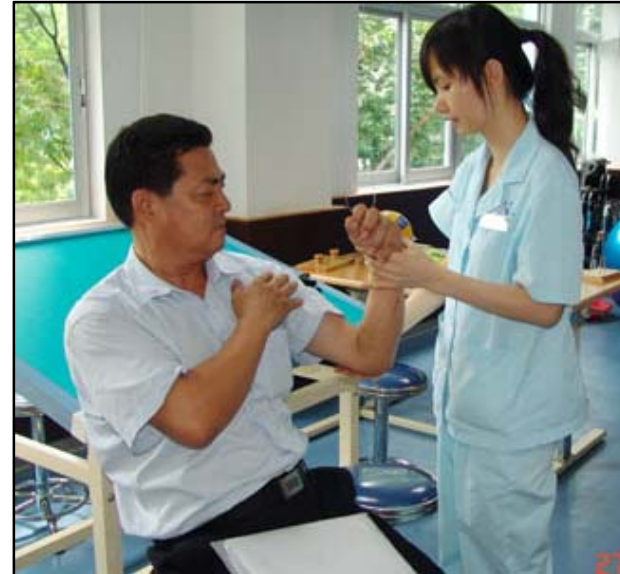

# Results

- Fugl-Meyer score upper limb part (FMA-UE) is used to reflect the outcomes.
- Two evaluations are performed before trial and after trial, respectively.
- Both groups had significant gains in FMA-UE scores
- Robotic therapy group patients have more gains than those assigned to conventional therapy, but have no significant differences.

**Table 2** Baseline sample characteristics and FMA-UE outcomes

|                      | Cases | Sex       | Age (years) | Before trial | After trail | $Z^*$  | $p^*$ | Change   |
|----------------------|-------|-----------|-------------|--------------|-------------|--------|-------|----------|
| Robotic therapy      | 12    | M(10)F(2) | 46.1±15.8   | 27.6±10.7    | 37.9±10.5   | -3.063 | 0.002 | 10.3±6.3 |
| Conventional therapy | 12    | M(9) F(3) | 46.9±10.1   | 26.2±6.0     | 32.8±7.0    | -3.064 | 0.002 | 6.7±3.1  |
| $Z^{**}$             |       |           |             | -0.289       | -1.245      |        |       |          |
| $p^{**}$             |       |           |             | 0.772        | 0.213       |        |       |          |

\* Mann-Whitney U-test is used to analyze data in the same group.

\*\* Wilcoxon rank-sum test is used to analyze data between groups.

**For more details please refer to the paper.**

**Thank you!**

Science China Information Sciences
